# Supplementary material
Source: Royal Society of Chemistry journal article supplement (doi:10.1039/d6cp00430j)
Supplement: d6cp00430j1.pdf [file d6cp00430j1.pdf]

## Superconductivity in Janus $M_2X$ MXenes ( $M = W, Mo, Nb$ , and $X = C, N$ ) functionalized with hydrogen and bromine

Abolfazl Zarenejad<sup>1</sup>, Mohammad Sandoghchi<sup>2</sup>, Mohammad Khazaei<sup>2\*</sup>, Mohammad Reza Mohammadizadeh<sup>1\*</sup>

<sup>1</sup> *Superconductivity Research Laboratory (SRL), Department of Physics, University of Tehran, North Kargar Ave. Tehran, 14395-547, Iran*

<sup>2</sup> *Department of Physics, University of Tehran, North Kargar Ave., Tehran, 14395-547, Iran*

Tables S1 and S2 summarize the adsorption site configurations of Janus MXenes in the 1T and 2H phases, respectively. Tables S3–S8 report the calculated total energies ( $E_{tot}$ ) and formation energies ( $\Delta_E$ ) for all configurations of  $Mo_2CHBr$ ,  $Mo_2NHBr$ ,  $W_2CHBr$ ,  $W_2NHBr$ ,  $Nb_2CHBr$ , and  $Nb_2NHBr$ .

**Table S1. 1T-phase Janus MXene adsorption site configurations.**

| Config. | Hydrogen Site | Bromine Site | Atomic Position Description          |
|---------|---------------|--------------|--------------------------------------|
| 1       | Top- $M_2$    | Top- $M_2$   | Both above $M_2$ transition metal    |
| 2       | Hollow        | Hollow       | Both at <b>hexagon center</b>        |
| 3       | Top- $M_2$    | Hollow       | H above $M_2$ , Br at hexagon center |
| 4       | Hollow        | Top- $M_2$   | H at hexagon center, Br above $M_2$  |
| 5       | Top- $M_1$    | Top- $M_1$   | Both above $M_1$ transition metal    |
| 6       | Top- $M_1$    | Top- $M_2$   | H above $M_1$ , Br above $M_2$       |
| 7       | Top- $M_2$    | Top- $M_1$   | H above $M_2$ , Br above $M_1$       |
| 8       | Hollow        | Top- $M_1$   | H at hexagon center, Br above $M_1$  |
| 9       | Top- $M_1$    | Hollow       | H above $M_1$ , Br at hexagon center |

**Table S2. 2H-phase Janus MXene configurations.**

| Config. | Hydrogen Site | Bromine Site  | Atomic Arrangement              |
|---------|---------------|---------------|---------------------------------|
| 1       | Top-M         | Top-M         | Both above transition metals    |
| 2       | Top-X         | Top-X         | Both above X atoms              |
| 3       | <b>Hollow</b> | <b>Hollow</b> | Both at hexagon centers         |
| 4       | <b>Hollow</b> | Top-X         | H at hexagon center, Br above X |
| 5       | Top-X         | <b>Hollow</b> | H above X, Br at hexagon center |
| 6       | Top-X         | Top-M         | H above X, Br above M           |
| 7       | Top-M         | Top-X         | H above M, Br above X           |
| 8       | Top-M         | <b>Hollow</b> | H above M, Br at hexagon center |
| 9       | <b>Hollow</b> | Top-M         | H at hexagon center, Br above M |

**Table S3. The total energy ( $E_{tot}$ ) of  $Mo_2CHBr$  structures along with their formation energy ( $\Delta_E$ ) is presented for each configuration.**

| 1T | $\Delta_E(eV)$ | 2H | $\Delta_E(eV)$ |
|----|----------------|----|----------------|
| S1 | -0.02          | S1 | 0.42           |
| S2 | 0.02           | S2 | 0.09           |
| S3 | -0.03          | S3 | 0.01           |
| S4 | 0.05           | S4 | 0.02           |
| S5 | 0.12           | S5 | 0.06           |
| S6 | 0.05           | S6 | 0.13           |
| S7 | 0.00           | S7 | 0.30           |
| S8 | 0.03           | S8 | 0.31           |
| S9 | 0.07           | S9 | 0.08           |

**Table S4. The total energy (E<sub>tot</sub>) of Mo<sub>2</sub>NHBr structures along with their formation energy ( $\Delta_E$ ) is presented for each configuration.**

| 1T | $\Delta_E(eV)$ | 2H | $\Delta_E(eV)$ |
|----|----------------|----|----------------|
| S1 | -0.01          | S1 | 0.18           |
| S2 | 0.06           | S2 | 0.02           |
| S3 | -0.02          | S3 | -0.11          |
| S4 | 0.01           | S4 | -0.08          |
| S5 | 0.08           | S5 | -0.04          |
| S6 | 0.02           | S6 | 0.03           |
| S7 | 0.01           | S7 | 0.16           |
| S8 | 0.05           | S8 | 0.14           |
| S9 | 0.06           | S9 | -0.03          |

**Table S5. The total energy (E<sub>tot</sub>) of W<sub>2</sub>CHBr structures along with their formation energy ( $\Delta_E$ ) is presented for each configuration.**

| 1T | $\Delta_E(eV)$ | 2H | $\Delta_E(eV)$ |
|----|----------------|----|----------------|
| S1 | 0.21           | S1 | 0.45           |
| S2 | 0.24           | S2 | 0.23           |
| S3 | 0.19           | S3 | 0.17           |
| S4 | 0.27           | S4 | 0.18           |
| S5 | 0.21           | S5 | 0.21           |
| S6 | 0.21           | S6 | 0.24           |
| S7 | 0.17           | S7 | 0.38           |
| S8 | 0.21           | S8 | 0.39           |
| S9 | 0.22           | S9 | 0.57           |

**Table S6. The total energy (E<sub>tot</sub>) of W<sub>2</sub>NHBr structures along with their formation energy ( $\Delta_E$ ) is presented for each configuration.**

| 1T | $\Delta_E(eV)$ | 2H | $\Delta_E(eV)$ |
|----|----------------|----|----------------|
| S1 | 0.08           | S1 | 0.12           |
| S2 | 0.19           | S2 | 0.03           |
| S3 | 0.12           | S3 | 0.08           |
| S4 | 0.14           | S4 | 0.01           |
| S5 | 0.12           | S5 | 0.03           |
| S6 | 0.14           | S6 | 0.07           |
| S7 | 0.06           | S7 | 0.18           |
| S8 | 0.09           | S8 | 0.13           |
| S9 | 0.14           | S9 | -0.02          |

**Table S7. The total energy (E<sub>tot</sub>) of Nb<sub>2</sub>CHBr structures along with their formation energy ( $\Delta_E$ ) is presented for each configuration.**

| 1T | $\Delta_E(eV)$ | 2H | $\Delta_E(eV)$ |
|----|----------------|----|----------------|
| S1 | -0.58          | S1 | 0.26           |
| S2 | -0.48          | S2 | -0.38          |
| S3 | -0.49          | S3 | -0.36          |
| S4 | -0.55          | S4 | -0.42          |
| S5 | -0.15          | S5 | -0.32          |
| S6 | -0.36          | S6 | -0.12          |
| S7 | -0.43          | S7 | -0.01          |
| S8 | -0.21          | S8 | 0.03           |
| S9 | -0.27          | S9 | -0.17          |

**Table S8. The total energy (E<sub>tot</sub>) of Nb<sub>2</sub>NHBr structures along with their formation energy (Δ<sub>E</sub>) is presented for each configuration.**

| 1T | Δ <sub>E</sub> (eV) | 2H | Δ <sub>E</sub> (eV) |
|----|---------------------|----|---------------------|
| S1 | -0.68               | S1 | -0.06               |
| S2 | -0.63               | S2 | -0.56               |
| S3 | -0.56               | S3 | -0.62               |
| S4 | -0.55               | S4 | -0.62               |
| S5 | -0.29               | S5 | -0.56               |
| S6 | -0.47               | S6 | -0.38               |
| S7 | -0.53               | S7 | -0.29               |
| S8 | -0.44               | S8 | -0.27               |
| S9 | -0.38               | S9 | -0.43               |

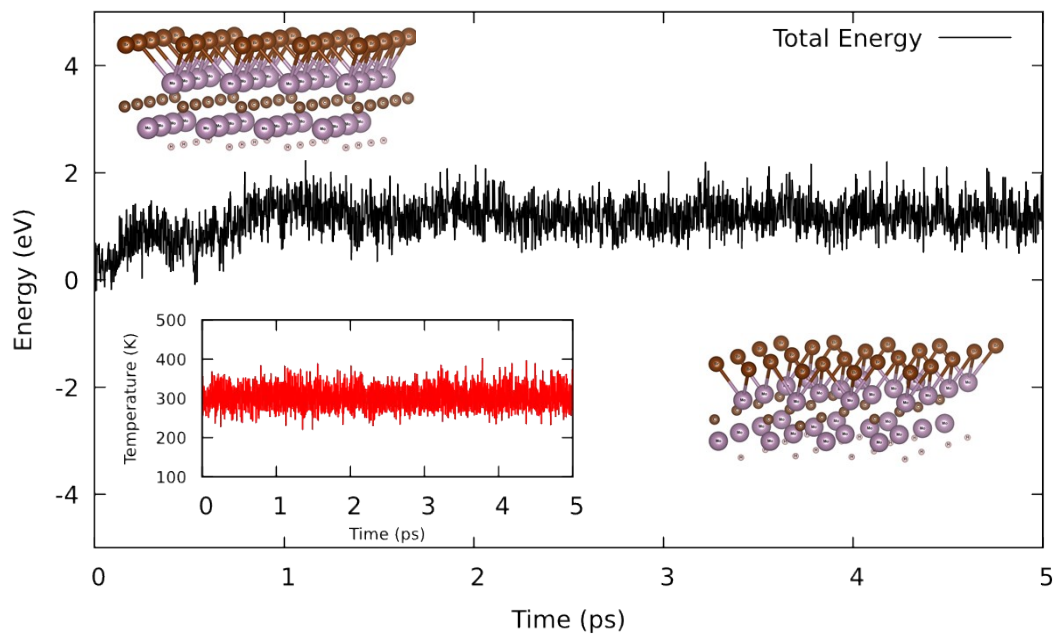

**Figure S1.** ab initio molecular dynamics (AIMD) simulations for a representative structure: the Mo<sub>2</sub>CHBr Janus compound.

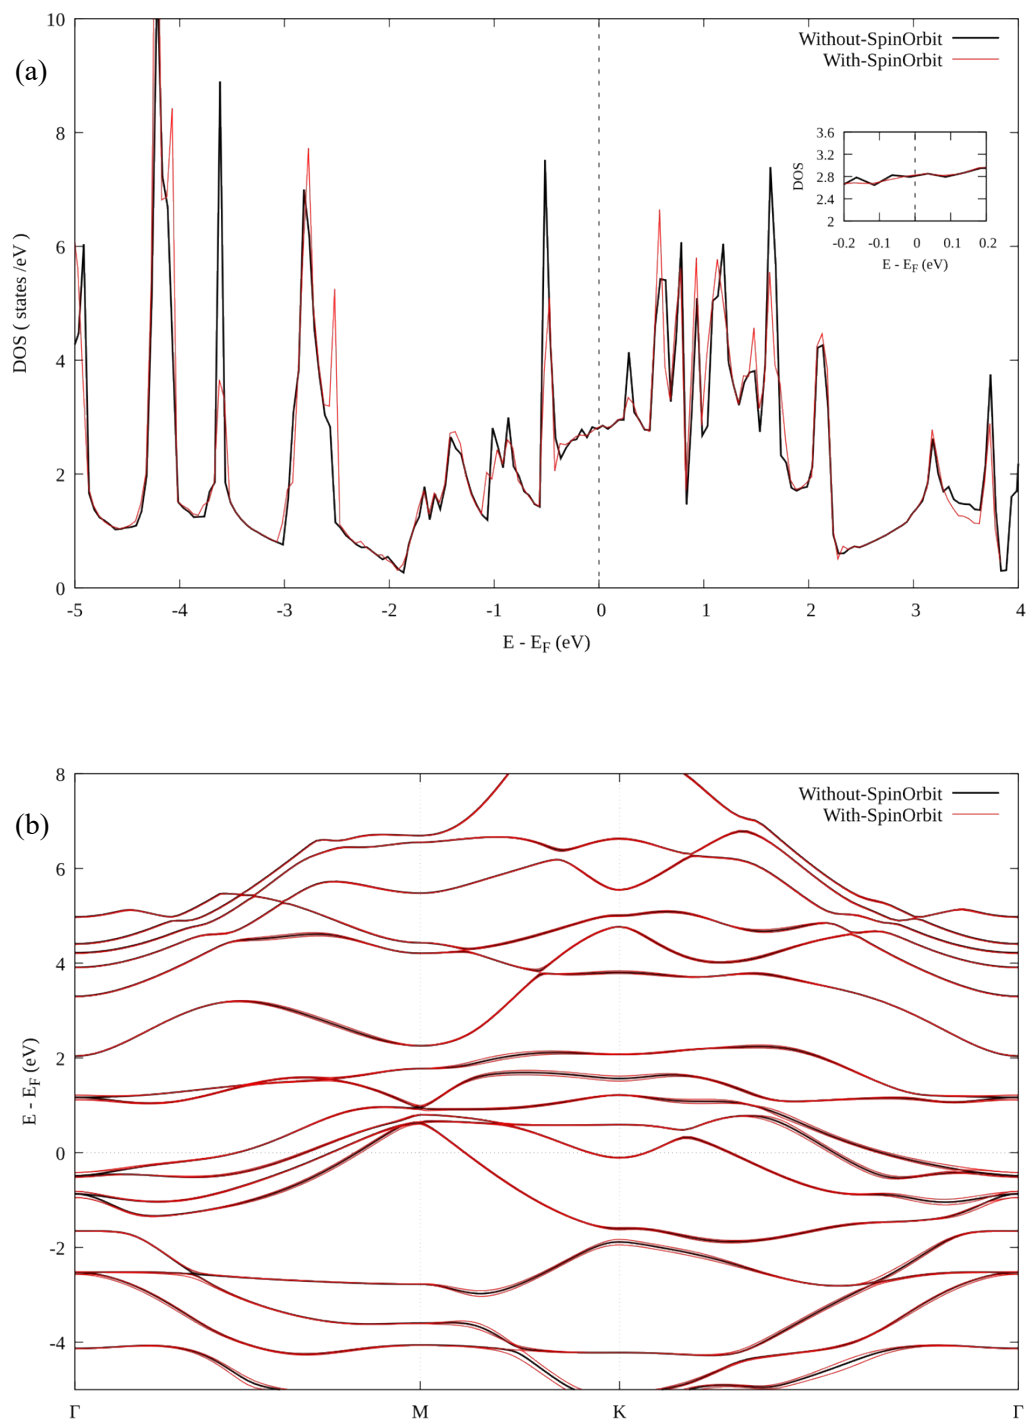

**Figure S2.** Density of states (a) and band structure (b) of the Mo<sub>2</sub>CHBr compound, calculated with (red lines) and without (black lines) spin-orbit interaction.

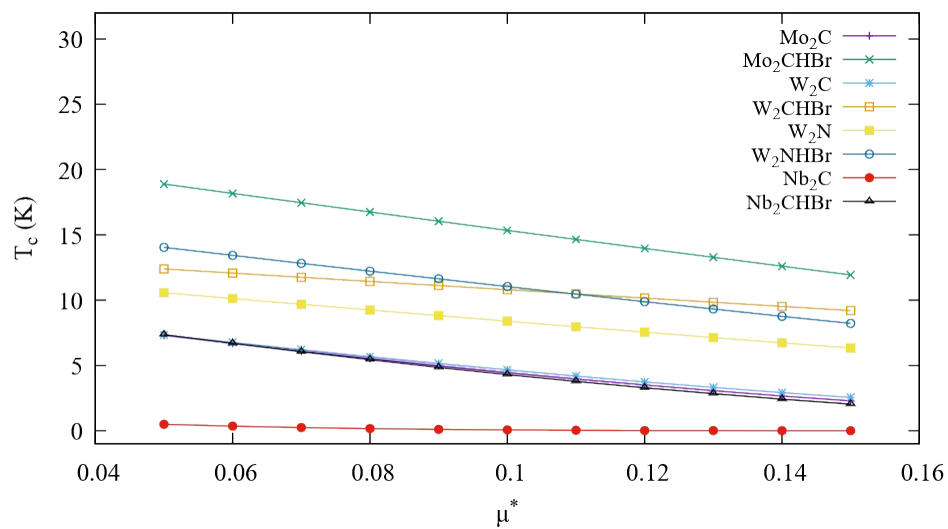

**Figure S3.** Dependence of the transition temperature on the Coulomb pseudopotential parameter ( $\mu^*$ ) for different compounds.
